# Supplementary material
Source: publisher site journal article supplement (https://www.dovepress.com/get_supplementary_file.php?f=454796.docx)
Supplement: Supplementary file 1 [file get_supplementary_file.php]

**Supplement**

Supplementary Table Sixteen combinations of two chronic diseases for caregivers with a moderate to severe burden

| Combination | Chronic disease | Antecedent | Support (%) | Confidence (%) | Lift |
| --- | --- | --- | --- | --- | --- |
| 1 | Cerebrovascular disease and Hyperlipidemia | Caregiver’s education: College and above  Caregiver’s mood: Hopelessness | 1.05 | 100 | 7.28 |
| Clinical dementia rating: Very mild dementia  Caregiver’s education: College and above  Caregiver’s mood: Hopelessness | 1.05 | 100 | 7.28 |
| Caregiver’s education: College and above  Employment: Employed  Caregiver’s mood: Hopelessness | 1.05 | 100 | 7.28 |
| Caregiver’s education: College and above  Relation to the patient: Child  Caregiver’s mood: Hopelessness | 1.05 | 100 | 7.28 |
| Clinical dementia rating: Very mild dementia  Employment: Employed  Caregiver’s mood: Hopelessness | 1.05 | 100 | 7.28 |
| Clinical dementia rating: Very mild dementia  Relation to the patient: Child  Caregiver’s mood: Hopelessness | 1.05 | 100 | 7.28 |
| Clinical dementia rating: Very mild dementia  Employment: Employed  Caregiver’s mood: Hopelessness | 1.05 | 100 | 7.28 |
| 2 | Hypertension and Anemia | Behavioral and Psychological symptoms: Agitation | 1.05 | 100 | 7.28 |
| Mood symptom: Emotional liability  Behavioral and Psychological symptoms: Agitation | 1.05 | 100 | 7.28 |
| Behavioral and Psychological symptoms: Agitation  Frequency of care: ≥ 6 days per week | 1.05 | 100 | 7.28 |
| Mood symptom: Anger  Behavioral and Psychological symptoms: Agitation | 1.05 | 100 | 7.28 |
| Mood symptom: Emotional liability  Behavioral and Psychological symptoms: Agitation  Frequency of care: ≥ 6 days per week | 1.05 | 100 | 7.28 |
| Mood symptom: Anger  Behavioral and Psychological symptoms: Agitation  Frequency of care: ≥ 6 days per week | 1.05 | 100 | 7.28 |
| Mood symptom: Anger and Emotional liability  Behavioral and Psychological symptoms: Agitation | 1.05 | 100 | 7.28 |
| Caregiver’s mood: Helplessness and Sadness | 1.05 | 100 | 7.28 |
| Caregiver’s education: College and above  Caregiver’s mood: Loneliness | 1.05 | 100 | 7.28 |
| Hypnotics: No use  Caregiver’s mood: Loneliness | 1.05 | 100 | 7.28 |
| Clinical dementia rating: Moderate dementia  Caregiver’s mood: Troublesome | 1.05 | 100 | 7.28 |
| Hypnotics: Poor response  Mood symptom: Anger | 1.05 | 100 | 7.28 |
| Caregiver’s education: College and above  Caregiver’s mood: Helplessness | 1.05 | 100 | 7.28 |
| Mood symptom: Emotional liability  Age of the caregiver: 50-59 | 1.05 | 100 | 7.28 |
| Age of the patient: 75-84  Mood symptom: Emotional liability | 1.05 | 100 | 7.28 |
| Mood symptom: Anger  Caregiver’s mood: Frustration | 1.05 | 100 | 7.28 |
| Hypnotics: No use  Caregiver’s mood: Helplessness and Sadness | 1.05 | 100 | 7.28 |
| Frequency of care: ≥ 6 days per week  Caregiver’s mood: Helplessness and Sadness | 1.05 | 100 | 7.28 |
| Caregiver’s education: College and above  Caregiver’s mood: Helplessness and Loneliness | 1.05 | 100 | 7.28 |
| Hypnotics: No use  Caregiver’s mood: Helplessness and Loneliness | 1.05 | 100 | 7.28 |
| Hypnotics: No use  Caregiver’s education: College and above  Caregiver’s mood: Loneliness | 1.05 | 100 | 7.28 |
| Caregiver’s education: College and above  Frequency of care: ≥ 6 days per week  Caregiver’s mood: Loneliness | 1.05 | 100 | 7.28 |
| Hypnotics: No use  Frequency of care: ≥ 6 days per week  Caregiver’s mood: Loneliness | 1.05 | 100 | 7.28 |
| Feeding: Feed by others  Employment: Employed  Caregiver’s mood: Anger | 1.05 | 100 | 7.28 |
| Mood symptom: Emotional liability  Behavioral and psychological symptoms: Nighttime behavior | 1.05 | 100 | 7.28 |
| Mood symptom: Emotional liability  Behavioral and psychological symptoms: Nighttime behavior  Type of primary care: Shared caregiving by different relatives | 1.05 | 100 | 7.28 |
| Mood symptom: Emotional liability  Behavioral and psychological symptoms: Nighttime behavior  Relation to the patient: Child | 1.05 | 100 | 7.28 |
| Mood symptom: Emotional liability  Behavioral and psychological symptoms: Nighttime behavior  Frequency of care: ≥ 6 days per week | 1.05 | 100 | 7.28 |
| Clinical dementia rating: Moderate dementia  Mood symptom: Emotional liability  Caregiver’s mood: Troublesome | 1.05 | 100 | 7.28 |
| Clinical dementia rating: Moderate dementia  Frequency of care ≥ 6 days per week  Caregiver’s mood: Troublesome | 1.05 | 100 | 7.28 |
| Clinical dementia rating: Moderate dementia  Caregivers’ marital status: Married  Caregiver’s mood: Troublesome | 1.05 | 100 | 7.28 |
| Hypnotics: Poor response  Mood symptom: Anger and Emotional liability | 1.05 | 100 | 7.28 |
| Hypnotics: Poor response  Mood symptom: Emotional liability  Employment: Employed | 1.05 | 100 | 7.28 |
| Hypnotics: Poor response  Mood symptom: Emotional liability  Relation to the patient: Child | 1.05 | 100 | 7.28 |
| Hypnotics: Poor response  Mood symptom: Anger  Employment: Employed | 1.05 | 100 | 7.28 |
| Hypnotics: Poor response  Mood symptom: Anger  Relation to the patient: Child | 1.05 | 100 | 7.28 |
| Mood symptom: Emotional liability  Age of the caregiver: 50-59  Caregiver’s mood: Hopelessness | 1.05 | 100 | 7.28 |
| Mood symptom: Emotional liability  Caregiver’s education: College and above  Caregiver’s mood: Hopelessness | 1.05 | 100 | 7.28 |
| Age of the patient: ≥ 85  Caregiver’s mood: Frustration and Hopelessness | 1.05 | 100 | 7.28 |
| Caregiver’s education: College and above  Caregiver’s mood: Frustration and Hopelessness | 1.05 | 100 | 7.28 |
| Caregiver’s education: College and above  Type of primary care: Shared caregiving by different relatives  Caregiver’s mood: Hopelessness | 1.05 | 100 | 7.28 |
| Caregiver’s education: College and above  Caregivers’ marital status: Married  Caregiver’s mood: Hopelessness | 1.05 | 100 | 7.28 |
| Age of the patient: ≥ 85  Mood symptoms: Emotional liability  Caregiver’s mood: Helplessness | 1.05 | 100 | 7.28 |
| Mood symptoms: Emotional liability  Age of the caregiver: 50-59  Caregiver’s mood: Helplessness | 1.05 | 100 | 7.28 |
| Mood symptoms: Emotional liability  Caregiver’s education: College and above  Caregiver’s mood: Helplessness | 1.05 | 100 | 7.28 |
| Type of dementia: Alzheimer’s disease  Mood symptoms: Emotional liability  Caregiver’s mood: Helplessness | 1.05 | 100 | 7.28 |
| Hypnotics: No use  Mood symptoms: Emotional liability  Caregiver’s mood: Helplessness | 1.05 | 100 | 7.28 |
| Age of the patient: ≥ 85  Caregiver’s mood: Frustration and Helplessness | 1.05 | 100 | 7.28 |
| Caregiver’s education: College and above  Caregiver’s mood: Frustration and Helplessness | 1.05 | 100 | 7.28 |
| Employment: Employed  Type of primary care: Shared caregiving by a caregiver and a foreign worker/household  Caregiver’s mood: Helplessness | 1.05 | 100 | 7.28 |
| Age of the patient: ≥ 85  Caregiver’s education: College and above  Caregiver’s mood: Helplessness | 1.05 | 100 | 7.28 |
| Age of the patient: ≥ 85  Type of dementia: Alzheimer’s disease  Caregiver’s mood: Helplessness | 1.05 | 100 | 7.28 |
| Age of the caregiver: 50-59  Caregiver’s education: College and above  Caregiver’s mood: Helplessness | 1.05 | 100 | 7.28 |
| Type of dementia: Alzheimer’s disease  Caregiver’s education: College and above  Caregiver’s mood: Helplessness | 1.05 | 100 | 7.28 |
| Relation to the patient: Child  Caregiver’s education: College and above  Caregiver’s mood: Helplessness | 1.05 | 100 | 7.28 |
| Hypnotics: No use  Caregiver’s education: College and above  Caregiver’s mood: Helplessness | 1.05 | 100 | 7.28 |
| Caregiver’s education: College and above  Frequency of care: ≥ 6 days per week  Caregiver’s mood: Helplessness | 1.05 | 100 | 7.28 |
| Feeding: Independent  Caregiver’s education: College and above  Caregiver’s mood: Helplessness | 1.05 | 100 | 7.28 |
| Mood symptom: Anger and Emotional liability  Caregiver’s mood: Frustration | 1.05 | 100 | 7.28 |
| Mood symptom: Anger and Emotional liability  Age of the caregiver: 50-59 | 1.05 | 100 | 7.28 |
| Age of the patient: ≥ 85  Mood symptom: Emotional liability  Caregiver’s mood: Frustration | 1.05 | 100 | 7.28 |
| Mood symptom: Emotional liability  Age of the caregiver: 50-59  Caregiver’s mood: Frustration | 1.05 | 100 | 7.28 |
| Mood symptom: Emotional liability  Caregiver’s education: College and above  Caregiver’s mood: Frustration | 1.05 | 100 | 7.28 |
| Type of dementia: Alzheimer’s disease  Mood symptom: Emotional liability  Caregiver’s mood: Frustration | 1.05 | 100 | 7.28 |
| Mood symptom: Emotional liability  Relation to the patient: Child  Caregiver’s mood: Frustration | 1.05 | 100 | 7.28 |
| Type of dementia: Alzheimer’s disease  Mood symptom: Dysthymia and Emotional liability | 1.05 | 100 | 7.28 |
| Age of the patient: ≥ 85  Mood symptom: Emotional liability  Age of the caregiver: 50-59 | 1.05 | 100 | 7.28 |
| Mood symptom: Emotional liability  Age of the caregiver: 50-59  Caregiver’s mood: Troublesome | 1.05 | 100 | 7.28 |
| Mood symptom: Emotional liability  Caregiver’s education: College and above  Caregiver’s mood: Troublesome | 1.05 | 100 | 7.28 |
| Mood symptom: Emotional liability  Caregiver’s education: College and above  Age of the caregiver: 50-59 | 1.05 | 100 | 7.28 |
| Type of dementia: Alzheimer’s disease  Mood symptom: Emotional liability  Age of the caregiver: 50-59 | 1.05 | 100 | 7.28 |
| Mood symptom: Emotional liability  Age of the caregiver: 50-59  Relation to the patient: Child | 1.05 | 100 | 7.28 |
| Mood symptom: Emotional liability  Age of the caregiver: 50-59  Frequency of care: ≥ 6 days per week | 1.05 | 100 | 7.28 |
| Mood symptom: Emotional liability  Age of the caregiver: 50-59  Caregivers’ marital status: Married | 1.05 | 100 | 7.28 |
| Feeding: Independent  Mood symptom: Emotional liability  Age of the caregiver: 50-59 | 1.05 | 100 | 7.28 |
| Age of the patient: 75-84  Gender: Male  Mood symptom: Emotional liability | 1.05 | 100 | 7.28 |
| Age of the patient: 75-84  Mood symptom: Emotional liability  Frequency of care: ≥ 6 days per week | 1.05 | 100 | 7.28 |
| Age of the patient: 75-84  Mood symptom: Emotional liability  Caregivers’ marital status: Married | 1.05 | 100 | 7.28 |
| Age of the patient: ≥ 85  Mood symptom: Anger  Caregiver’s mood: Frustration | 1.05 | 100 | 7.28 |
| Type of dementia: Alzheimer’s disease  Mood symptom: Anger  Caregiver’s mood: Frustration | 1.05 | 100 | 7.28 |
| Mood symptom: Anger  Frequency of care: ≥ 6 days per week  Caregiver’s mood: Frustration | 1.05 | 100 | 7.28 |
| Feeding: Independent  Mood symptom: Anger  Caregiver’s mood: Frustration | 1.05 | 100 | 7.28 |
| Age of the patient: ≥ 85  Clinical dementia rating: Very mild dementia  Caregiver’s mood: Frustration | 1.05 | 100 | 7.28 |
| Age of the patient: ≥ 85  Employment: Employed  Caregiver’s mood: Frustration | 1.05 | 100 | 7.28 |
| Caregiver’s education: College and above  Caregiver’s mood: Frustration and Troublesome | 1.05 | 100 | 7.28 |
| Caregiver’s education: College and above  Employment: Employed  Caregiver’s mood: Frustration | 1.05 | 100 | 7.28 |
| Age of the patient: ≥ 85  Clinical dementia rating: Very mild dementia  Caregiver’s mood: Nervousness | 1.05 | 100 | 7.28 |
| 3 | Anemia and Hearing impairment | Caregiver’s education: College and above  Caregiver’s mood: Helplessness and Frustration | 1.05 | 100 | 7.28 |
| Caregiver’s education: College and above  Caregiver’s mood: Hopelessness | 1.40 | 100 | 7.28 |
| Caregiver’s education: College and above  Caregiver’s mood: Helplessness and Hopelessness | 1.05 | 100 | 7.28 |
| Caregiver’s education: College and above  Caregiver’s mood: Helplessness and Frustration | 1.05 | 100 | 7.28 |
| Age of the patient: ≥ 85  Caregiver’s mood: Frustration and Hopelessness | 1.05 | 100 | 7.28 |
| Caregiver’s education: College and above  Caregiver’s mood: Frustration and Hopelessness | 1.40 | 100 | 7.28 |
| Age of the patient: ≥ 85  Caregiver’s education: College and above  Caregiver’s mood: Hopelessness | 1.05 | 100 | 7.28 |
| Age of the patient: ≥ 85  Type of dementia: Alzheimer’s disease  Caregiver’s mood: Hopelessness | 1.05 | 100 | 7.28 |
| Age of the patient: ≥ 85  Frequency of care: ≥ 6 days per week  Caregiver’s mood: Hopelessness | 1.05 | 100 | 7.28 |
| Caregiver’s education: College and above  Caregiver’s mood: Nervousness and Hopelessness | 1.05 | 100 | 7.28 |
| Caregiver’s education: College and above  Type of primary care: Shared caregiving by different relatives  Caregiver’s mood: Hopelessness | 1.05 | 100 | 7.28 |
| Type of dementia: Alzheimer’s disease  Caregiver’s education: College and above  Caregiver’s mood: Hopelessness | 1.40 | 100 | 7.28 |
| Relation to the patient: Child  Caregiver’s education: College and above  Caregiver’s mood: Hopelessness | 1.05 | 100 | 7.28 |
| Hypnotics: No use  Caregiver’s education: College and above  Caregiver’s mood: Hopelessness | 1.40 | 100 | 7.28 |
| Caregiver’s education: College and above  Frequency of care: ≥ 6 days per week  Caregiver’s mood: Hopelessness | 1.05 | 100 | 7.28 |
| Caregivers’ marital status: Married  Caregiver’s education: College and above  Caregiver’s mood: Hopelessness | 1.05 | 100 | 7.28 |
| Feeding: Independent  Caregiver’s education: College and above  Caregiver’s mood: Hopelessness | 1.40 | 100 | 7.28 |
| Mood symptom: Emotional liability  Frequency of care: ≥ 6 days per week  Caregiver’s mood: Troublesome | 1.05 | 100 | 7.28 |
| Hypnotics: No use  Mood symptom: Emotional liability  Frequency of care: ≥ 6 days per week | 1.05 | 100 | 7.28 |
| Caregiver’s education: College and above  Caregiver’s mood: Frustration and Troublesome | 1.05 | 100 | 7.28 |
| Caregiver’s education: College and above  Type of primary care: Shared caregiving by different relatives  Caregiver’s mood: Frustration | 1.05 | 100 | 7.28 |
| Caregiver’s education: College and above  Caregivers’ marital status: Married  Caregiver’s mood: Frustration | 1.05 | 100 | 7.28 |
| 4 | Diabetes and Anemia | Caregiver’s mood: Helplessness and Sadness | 1.05 | 100 | 7.28 |
| Caregiver’s education: College and above  Caregiver’s mood: Helplessness | 1.05 | 100 | 7.28 |
| Clinical dementia rating: Very mild dementia  Caregiver’s mood: Helplessness | 1.05 | 100 | 7.28 |
| Hypnotics: No use  Caregiver’s mood: Helplessness and Sadness | 1.05 | 100 | 7.28 |
| Frequency of care: ≥ 6 days per week  Caregiver’s mood: Helplessness and Sadness | 1.05 | 100 | 7.28 |
| Age of the patient: 75-84  Clinical dementia rating: Very mild dementia  Caregiver’s mood: Helplessness | 1.05 | 100 | 7.28 |
| Relation to the patient: Child  Caregiver’s education: College and above  Caregiver’s mood: Helplessness | 1.05 | 100 | 7.28 |
| Hypnotics: No use  Caregiver’s education: College and above  Caregiver’s mood: Helplessness | 1.05 | 100 | 7.28 |
| Clinical dementia rating: Very mild dementia  Hypnotics: No use  Caregiver’s mood: Helplessness | 1.05 | 100 | 7.28 |
| Clinical dementia rating: Very mild dementia  Caregiver’s marital status: Married  Caregiver’s mood: Helplessness | 1.05 | 100 | 7.28 |
| Clinical dementia rating: Very mild dementia  Feeding: Independent  Caregiver’s mood: Helplessness | 1.05 | 100 | 7.28 |
| Caregiver’s education: College and above  Caregiver’s mood: Frustration and Troublesome | 1.05 | 100 | 7.28 |
| Relation to the patient: Child  Caregiver’s education: College and above  Caregiver’s mood: Frustration | 1.05 | 100 | 7.28 |
| Age of the patient: 75-84  Age of the caregiver: < 50  Caregiver’s mood: Troublesome | 1.05 | 100 | 7.28 |
| Age of the patient: ≥ 85  Age of the caregiver: < 50  Relation to the patient: Child | 1.05 | 100 | 7.28 |
| 5 | Cardiovascular disease and Hypertension | Age of the patient: 75-84  Behavioral and psychological symptoms: Hallucination | 1.05 | 100 | 7.28 |
| Caregiver’s mood: Troublesome and Hopelessness | 1.40 | 100 | 7.28 |
| Age of the caregiver: 50-59  Caregiver’s mood: Hopelessness | 1.05 | 100 | 7.28 |
| Age of the patient: 75-84  Caregiver’s mood: Hopelessness | 1.05 | 100 | 7.28 |
| Caregiver’s education: College and above  Caregiver’s mood: Hopelessness | 1.05 | 100 | 7.28 |
| Mood symptom: Irritability  Age of the caregiver: 50-59 | 1.05 | 100 | 7.28 |
| Mood symptom: Emotional liability  Age of the caregiver: 50-59 | 1.05 | 100 | 7.28 |
| Hypnotics: Poor response  Caregiver’s mood: Troublesome and Hopelessness | 1.05 | 100 | 7.28 |
| Age of the patient: 75-84  Hypnotics: Poor response  Caregiver’s mood: Hopelessness | 1.05 | 100 | 7.28 |
| Hypnotics: Poor response  Caregiver’s education: College and above  Caregiver’s mood: Hopelessness | 1.05 | 100 | 7.28 |
| Age of the patient: 75-84  Behavioral and psychological symptoms: Hallucination  Caregiver’s education: College and above | 1.05 | 100 | 7.28 |
| Age of the patient: 75-84  Behavioral and psychological symptoms: Hallucination  Frequency of care: ≥ 6 days per week | 1.05 | 100 | 7.28 |
| Age of the patient: 75-84  Behavioral and psychological symptoms: Hallucination  Caregivers’ marital status: Married | 1.05 | 100 | 7.28 |
| Age of the caregiver: 50-59  Caregiver’s mood: Troublesome and Hopelessness | 1.05 | 100 | 7.28 |
| Age of the patient: 75-84  Caregiver’s mood: Troublesome and Hopelessness | 1.05 | 100 | 7.28 |
| Caregiver’s education: College and above  Caregiver’s mood: Troublesome and Hopelessness | 1.40 | 100 | 7.28 |
| Frequency of care: ≥ 6 days per week  Caregiver’s mood: Troublesome and Hopelessness | 1.05 | 100 | 7.28 |
| Caregiver’s marital status: Married:  Caregiver’s mood: Troublesome and Hopelessness | 1.40 | 100 | 7.28 |
| Feeding: Independent  Caregiver’s mood: Troublesome and Hopelessness | 1.05 | 100 | 7.28 |
| Age of the caregiver: 50-59  Caregiver’s education: College and above  Caregiver’s mood: Hopelessness | 1.05 | 100 | 7.28 |
| Age of the caregiver: 50-59  Caregiver’s marital status: Married  Caregiver’s mood: Hopelessness | 1.05 | 100 | 7.28 |
| Age of the patient: 75-84  Caregiver’s marital status: Married  Caregiver’s mood: Hopelessness | 1.05 | 100 | 7.28 |
| Age of the patient: 75-84  Caregiver’s education: College and above  Caregiver’s mood: Hopelessness | 1.05 | 100 | 7.28 |
| Caregiver’s education: College and above  Frequency of care: ≥ 6 days per week  Caregiver’s mood: Hopelessness | 1.05 | 100 | 7.28 |
| Caregiver’ marital status: Married  Caregiver’s education: College and above  Caregiver’s mood: Hopelessness | 1.40 | 100 | 7.28 |
| Feeding: Independent  Caregiver’s education: College and above  Caregiver’s mood: Hopelessness | 1.05 | 100 | 7.28 |
| Age of the patient: 75-84  Mood symptom: Dysthymia and Irritability | 1.05 | 100 | 7.28 |
| Mood symptom: Dysthymia and Irritability  Caregiver’s education: College and above | 1.05 | 100 | 7.28 |
| Age of the patient: 75-84  Mood symptom: Irritability  Caregiver’s education: College and above | 1.05 | 100 | 7.28 |
| Age of the patient: 75-84  Mood symptom: Irritability  Caregiver’s marital status: Married | 1.05 | 100 | 7.28 |
| Age of the patient: 75-84  Feeding: Independent  Mood symptom: Irritability | 1.05 | 100 | 7.28 |
| Mood symptom: Emotional liability  Age of the caregiver: 50-59  Caregiver’s education: College and above | 1.05 | 100 | 7.28 |
| Mood symptom: Emotional liability  Age of the caregiver: 50-59  Frequency of care: ≥ 6 days per week | 1.05 | 100 | 7.28 |
| Mood symptom: Emotional liability  Age of the caregiver: 50-59  Caregiver’s marital status: Married | 1.05 | 100 | 7.28 |
| 6 | Cerebrovascular disease and Hypertension | Mood symptom: Depression  Caregiver’s mood: Troublesome | 1.05 | 100 | 7.28 |
| Type of dementia: Others  Caregiver’s marital status: Married  Employment: Employed | 1.05 | 100 | 7.28 |
| Age of the patient: 75-84  Mood symptom: Depression  Age of the caregiver: < 50 | 1.05 | 100 | 7.28 |
| Age of the patient: 75-84  Mood symptom: Depression  Caregiver’s mood: Troublesome | 1.05 | 100 | 7.28 |
| Mood symptom: Depression  Age of the caregiver: < 50  Caregiver’s mood: Troublesome | 1.05 | 100 | 7.28 |
| Mood symptom: Depression  Age of the caregiver: < 50  Frequency of care: ≥ 6 days per week | 1.05 | 100 | 7.28 |
| Feeding: Independent  Mood symptom: Depression  Age of the caregiver: < 50 | 1.05 | 100 | 7.28 |
| Mood symptom: Depression  Frequency of care: ≥ 6 days per week  Caregiver’s mood: Troublesome | 1.05 | 100 | 7.28 |
| Mood symptom: Depression  Caregiver’s marital status: Married  Caregiver’s mood: Troublesome | 1.05 | 100 | 7.28 |
| Feeding: Independent  Mood symptom: Depression  Caregiver’s mood: Troublesome | 1.05 | 100 | 7.28 |
| Caregiver’s education: College and above  Employment: Employed  Caregiver’s mood: Troublesome | 1.05 | 100 | 7.28 |
| Caregiver’s education: College and above  Frequency of care: ≥ 6 days per week  Caregiver’s mood: Troublesome | 1.05 | 100 | 7.28 |
| 7 | Cerebrovascular disease and Diabetes | Clinical dementia rating: Very mild dementia  Caregiver’s education: College and above  Employment: Employed | 1.05 | 100 | 7.28 |
| Age of the caregiver: < 50  Caregiver’s education: College and above  Caregiver’s mood: Nervousness | 1.05 | 100 | 7.28 |
| Clinical dementia rating: Very mild dementia  Age of the caregiver: < 50  Caregiver’s mood: Nervousness | 1.05 | 100 | 7.28 |
| Relation to the patient: Child  Age of the caregiver: < 50  Caregiver’s mood: Nervousness | 1.05 | 100 | 7.28 |
| Age of the caregiver: < 50  Caregiver’s education: College and above  Employment: Employed | 1.05 | 100 | 7.28 |
| Relation to the patient: Child  Age of the caregiver: < 50  Employment: Employed | 1.05 | 100 | 7.28 |
| Clinical dementia rating: Very mild dementia  Caregiver’s education: College and above  Caregiver’s mood: Nervousness | 1.05 | 100 | 7.28 |
| 8 | Hypertension and Diabetes | Age of the caregiver: < 50  Caregiver’s marital status: Single  Caregiver’s mood: Anger | 1.40 | 100 | 7.28 |
| Clinical dementia rating: Very mild dementia  Caregiver’s marital status: Single  Caregiver’s mood: Anger | 1.05 | 100 | 7.28 |
| Caregiver’s marital status: Single  Employment: Employed  Caregiver’s mood: Anger | 1.05 | 100 | 7.28 |
| Mood symptom: Depression  Age of the caregiver: < 50  Caregiver’s mood: Troublesome | 1.40 | 100 | 7.28 |
| Age of the patient: 75-84  Type of dementia: Others  Type of primary care: Others | 1.05 | 100 | 7.28 |
| Type of dementia: Others  Caregiver’s education: College and above  Type of primary care: Others | 1.05 | 100 | 7.28 |
| Type of dementia: Others  Employment: Employed  Caregiver’s mood: Anger | 1.05 | 100 | 7.28 |
| Type of dementia: Alzheimer’s disease  Mood symptom: Emotional liability  Caregiver’s mood: Hopelessness | 1.05 | 100 | 7.28 |
| Type of dementia: Vascular dementia  Age of the caregiver: < 50  Caregiver’s education: College and above | 1.05 | 100 | 7.28 |
| Mood symptom: Emotional liability  Caregiver’s mood: Sadness | 1.05 | 100 | 7.28 |
| Mood symptom: Emotional liability  Caregiver’s mood: Helplessness and Sadness | 1.05 | 100 | 7.28 |
| Type of dementia: Alzheimer’s disease  Mood symptom: Emotional liability  Caregiver’s mood: Sadness | 1.05 | 100 | 7.28 |
| Hypnotics: No use  Mood symptom: Emotional liability  Caregiver’s mood: Sadness | 1.05 | 100 | 7.28 |
| Caregiver’s marital status: Single  Caregiver’s mood: Emotional liability | 1.05 | 100 | 7.28 |
| Caregiver’s marital status: Single  Caregiver’s mood: Anger and Emotional liability | 1.05 | 100 | 7.28 |
| Relation to the patient: Child  Caregiver’s marital status: Single  Caregiver’s mood: Emotional liability | 1.05 | 100 | 7.28 |
| Hypnotics: No use  Caregiver’s marital status: Single  Caregiver’s mood: Emotional liability | 1.05 | 100 | 7.28 |
| Caregiver’s marital status: Single  Frequency of care: ≥ 6 days per week  Caregiver’s mood: Emotional liability | 1.05 | 100 | 7.28 |
| 9 | Hypertension and Chronic kidney disease | Caregiver’s education: College and above  Caregiver’s mood: Troublesome and Hopelessness | 1.05 | 100 | 7.28 |
| Age of the caregiver: < 50  Caregiver’s education: College and above  Caregiver’s mood: Hopelessness | 1.05 | 100 | 7.28 |
| Relation to the patient: Child  Caregiver’s education: College and above  Caregiver’s mood: Hopelessness | 1.05 | 100 | 7.28 |
| Caregiver’s education: College and above  Frequency of care: ≥ 6 days per week  Caregiver’s mood: Hopelessness | 1.05 | 100 | 7.28 |
| Age of the caregiver: 50-59  Caregiver’s education: College and above  Caregiver’s mood: Nervousness | 1.05 | 100 | 7.28 |
| 10 | Chronic kidney disease and Anemia | Mood symptom: Emotional liability  Type of primary care: Shared caregiving by different relatives  Caregiver’s mood: Troublesome | 1.05 | 100 | 7.28 |
| Mood symptom: Emotional liability  Frequency of care: ≥ 6 days per week  Caregiver’s mood: Troublesome | 1.05 | 100 | 7.28 |
| 11 | Diabetes and Chronic kidney disease | Age of the caregiver: 50-59  Caregiver’s education: College and above  Caregiver’s mood: Nervousness | 1.05 | 100 | 7.28 |
| Hypnotics: No use  Caregiver’s education: College and above  Caregiver’s mood: Nervousness | 1.05 | 100 | 7.28 |
| 12 | Diabetes and Hearing impairment | Age of the caregiver: < 50  Caregiver’s mood: Troublesome | 1.05 | 100 | 7.28 |
| Caregiver’s education: College and above  Caregiver’s mood: Troublesome | 1.05 | 100 | 7.28 |
| Hypnotics: No use  Mood symptom: Emotional liability  Frequency of care: ≥ 6 days per week | 1.05 | 100 | 7.28 |
| Gender of the patient: Male  Age of the caregiver: < 50  Caregiver’s mood: Troublesome | 1.05 | 100 | 7.28 |
| Age of the caregiver: < 50  Employment: Employed  Caregiver’s mood: Troublesome | 1.05 | 100 | 7.28 |
| Age of the caregiver: < 50  Relation to the patient: Child  Caregiver’s mood: Troublesome | 1.05 | 100 | 7.28 |
| Hypnotics: No use  Age of the caregiver: < 50  Caregiver’s mood: Troublesome | 1.05 | 100 | 7.28 |
| Age of the patient: > 85  Type of dementia: Alzheimer’s disease  Clinical dementia rating: Very mild dementia | 1.05 | 100 | 7.28 |
| Relation to the patient: Child  Caregiver’s education: College and above  Caregiver’s mood: Troublesome | 1.05 | 100 | 7.28 |
| Hypnotics: No use  Caregiver’s education: College and above  Caregiver’s mood: Troublesome | 1.05 | 100 | 7.28 |
| Feeding: Independent  Caregiver’s education: College and above  Caregiver’s mood: Troublesome | 1.05 | 100 | 7.28 |
| 13 | Diabetes and Hyperlipidemia | Type of dementia: Alzheimer’s disease  Mood symptom: Emotional liability  Caregiver’s mood: Hopelessness | 1.05 | 100 | 7.28 |
| Hypnotics: No use  Mood symptom: Depression  Caregiver’s mood: Troublesome | 1.05 | 100 | 7.28 |
| Hypnotics: No use  Mood symptom: Depression  Caregiver’s mood: Nervousness | 1.05 | 100 | 7.28 |
| Age of the patient: 75-84  Gender of the patient: Male  Mood symptom: Emotional liability | 1.05 | 100 | 7.28 |
| Age of the patient: 75-84  Gender of the patient: Male  Type of primary care: Shared caregiving by different relatives | 1.05 | 100 | 7.28 |
| 14 | Hyperlipidemia and Anemia | Caregiver’s education: College and above  Caregiver’s mood: Helplessness and Frustration | 1.05 | 100 | 7.28 |
| Caregiver’s education: College and above  Caregiver’s mood: Helplessness | 1.05 | 100 | 7.28 |
| Age of the caregiver: < 50  Caregiver’s mood: Frustration | 1.05 | 100 | 7.28 |
| Caregiver’s education: College and above  Caregiver’s mood: Helplessness and Nervousness | 1.05 | 100 | 7.28 |
| Type of dementia: Alzheimer’s disease  Caregiver’s education: College and above  Caregiver’s mood: Helplessness | 1.05 | 100 | 7.28 |
| Caregiver’s education: College and above  Employment: Employed  Caregiver’s mood: Helplessness | 1.05 | 100 | 7.28 |
| Relation to the patient: Child  Caregiver’s education: College and above  Caregiver’s mood: Helplessness | 1.05 | 100 | 7.28 |
| Hypnotics: No use  Caregiver’s education: College and above  Caregiver’s mood: Helplessness | 1.05 | 100 | 7.28 |
| Caregiver’s education: College and above  Frequency of care: ≥ 6 days per week  Caregiver’s mood: Helplessness | 1.05 | 100 | 7.28 |
| Feeding: Independent  Caregiver’s education: College and above  Caregiver’s mood: Helplessness | 1.05 | 100 | 7.28 |
| Age of the patient: 75-84  Age of the caregiver: < 50  Caregiver’s mood: Frustration | 1.05 | 100 | 7.28 |
| Age of the caregiver: < 50  Caregiver’s education: College and above  Caregiver’s mood: Frustration | 1.05 | 100 | 7.28 |
| Age of the caregiver: < 50  Employment: Employed  Caregiver’s mood: Frustration | 1.05 | 100 | 7.28 |
| Age of the caregiver: < 50  Relation to the patient: Child  Caregiver’s mood: Frustration | 1.05 | 100 | 7.28 |
| Age of the caregiver: < 50  Caregiver’s marital status: Married  Caregiver’s mood: Frustration | 1.05 | 100 | 7.28 |
| Feeding: Independent  Age of the caregiver: < 50  Caregiver’s mood: Frustration | 1.05 | 100 | 7.28 |
| Caregiver’s education: College and above  Caregiver’s mood: Frustration and Troublesome | 1.05 | 100 | 7.28 |
| Caregiver’s education: College and above  Employment: Employed  Caregiver’s mood: Frustration | 1.40 | 100 | 7.28 |
| Relation to the patient: Child  Caregiver’s education: College and above  Caregiver’s mood: Frustration | 1.76 | 100 | 7.28 |
| Age of the caregiver: < 50  Caregiver’s marital status: Married  Caregiver’s education: College and above | 1.05 | 100 | 7.28 |
| Age of the caregiver: < 50  Caregiver’s marital status: Married  Caregiver’s mood: Troublesome | 1.05 | 100 | 7.28 |
| 15 | Hypertension and Hyperlipidemia | Hypnotics: No use  Mood symptom: Depression  Caregiver’s mood: Nervousness | 1.05 | 100 | 7.28 |
| 16 | Hypertension and Hearing impairment | Age of the caregiver: 50-59  Caregiver’s education: College and above  Caregiver’s mood: Hopelessness | 1.05 | 100 | 7.28 |
